# Supplementary material for: Okadaic Acid Exposure Induced Neural Tube Defects in Chicken (Gallus gallus) Embryos
Source: MDPI journal article supplement (doi:10.3390/md19060322), 2021-06-02

**Supplementary Table S1** Reads quality statistics

| Sample | Total Raw<br>Reads (M) | Total<br>Clean<br>Reads<br>(M) | Total Clean<br>Bases (Gb) | Clean<br>Reads<br>Q20 (%) | Clean<br>Reads<br>Q30 (%) | Clean<br>Reads<br>Ratio (%) |
|--------|------------------------|--------------------------------|---------------------------|---------------------------|---------------------------|-----------------------------|
| Ctrl   | 75.2                   | 70.8                           | 7.08                      | 97.53                     | 89.62                     | 94.15                       |
| Ctrl   | 77.7                   | 72.83                          | 7.28                      | 97.56                     | 89.75                     | 93.73                       |
| Ctrl   | 72.33                  | 67.85                          | 6.79                      | 97.56                     | 89.75                     | 93.81                       |
| OA1    | 70.18                  | 65.93                          | 6.59                      | 97.53                     | 89.66                     | 93.93                       |
| OA2    | 75.2                   | 70.66                          | 7.07                      | 97.54                     | 89.6                      | 93.97                       |
| OA3    | 72.69                  | 68.39                          | 6.84                      | 97.58                     | 89.75                     | 94.09                       |

**Supplementary Table S2** Reference genome alignment statistics

| Sample | Total Clean<br>Reads (M) | Total<br>Mapping (%) | Uniquely<br>Mapping (%) |
|--------|--------------------------|----------------------|-------------------------|
| Ctrl   | 70.8                     | 89.96                | 67.82                   |
| Ctrl   | 72.83                    | 89.84                | 67.97                   |
| Ctrl   | 67.85                    | 89.6                 | 67.81                   |
| OA1    | 65.93                    | 89.27                | 67.17                   |
| OA2    | 70.66                    | 90.16                | 68.03                   |
| OA3    | 68.39                    | 89.5                 | 67.5                    |

**Figure Legends**

**Supplementary Figure 1** Classification map of GO annotation after OA treatment.

**Supplementary Figure 2** Differential gene KEGG Pathway classification after exposed to OA.

**Supplementary Figure 3** Correlation between different biological replicates.

Figure S1

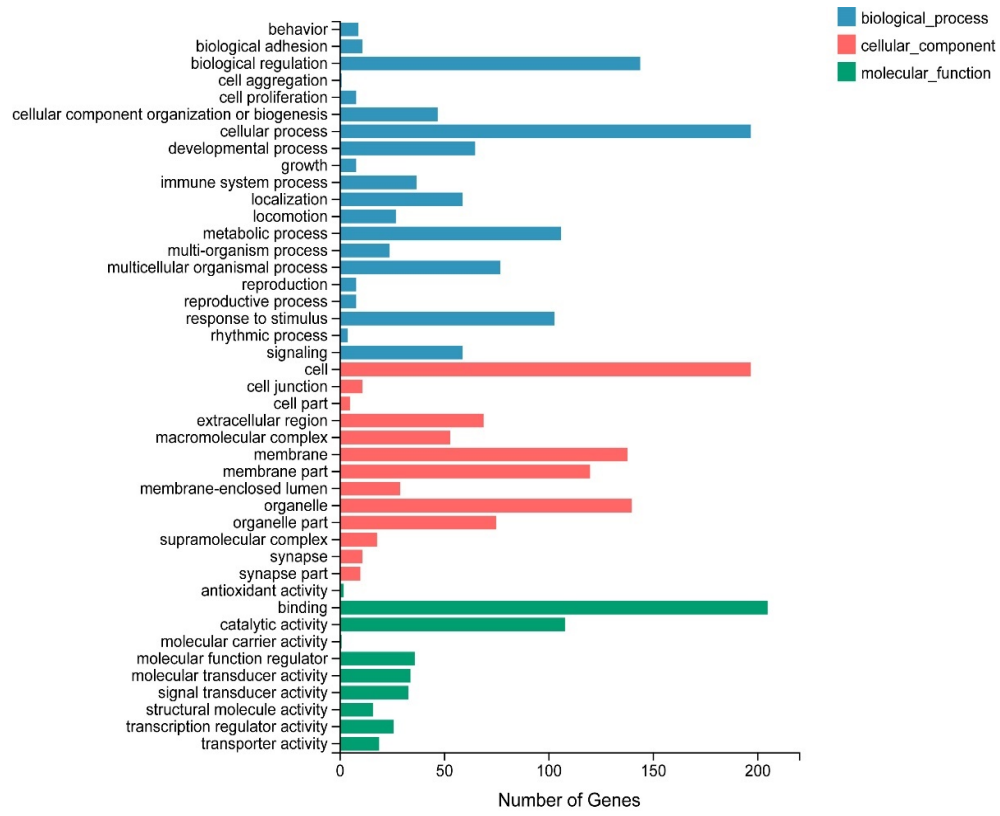

Figure S2

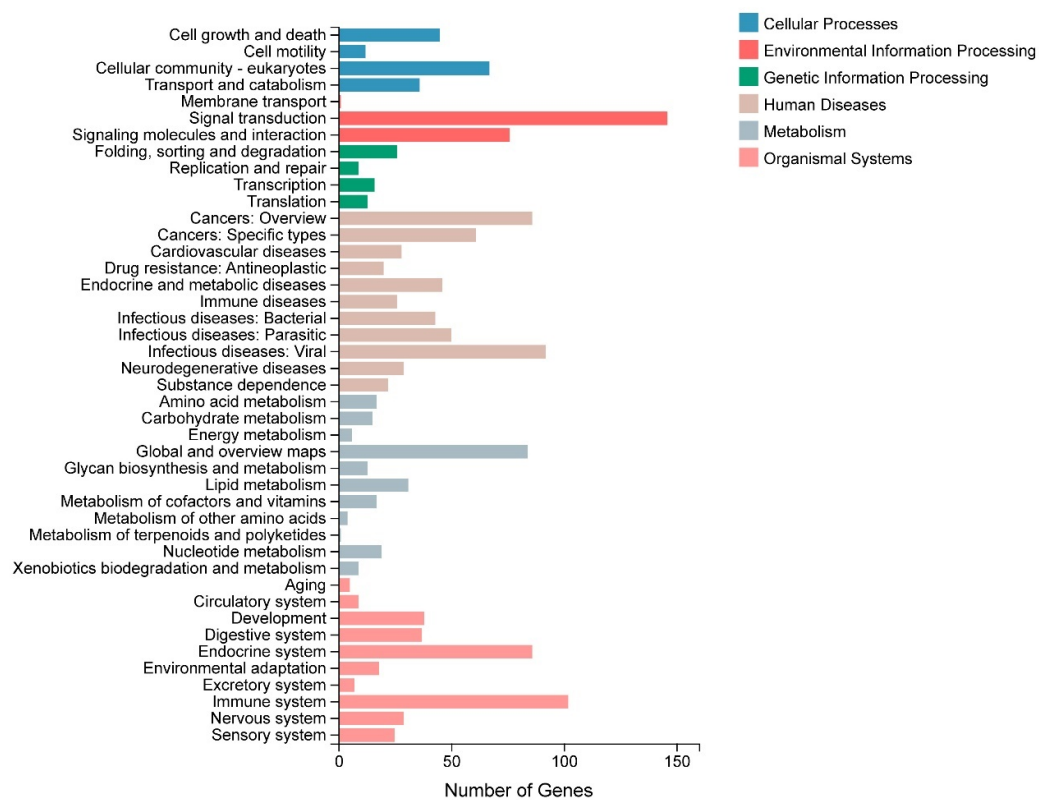

Figure S3

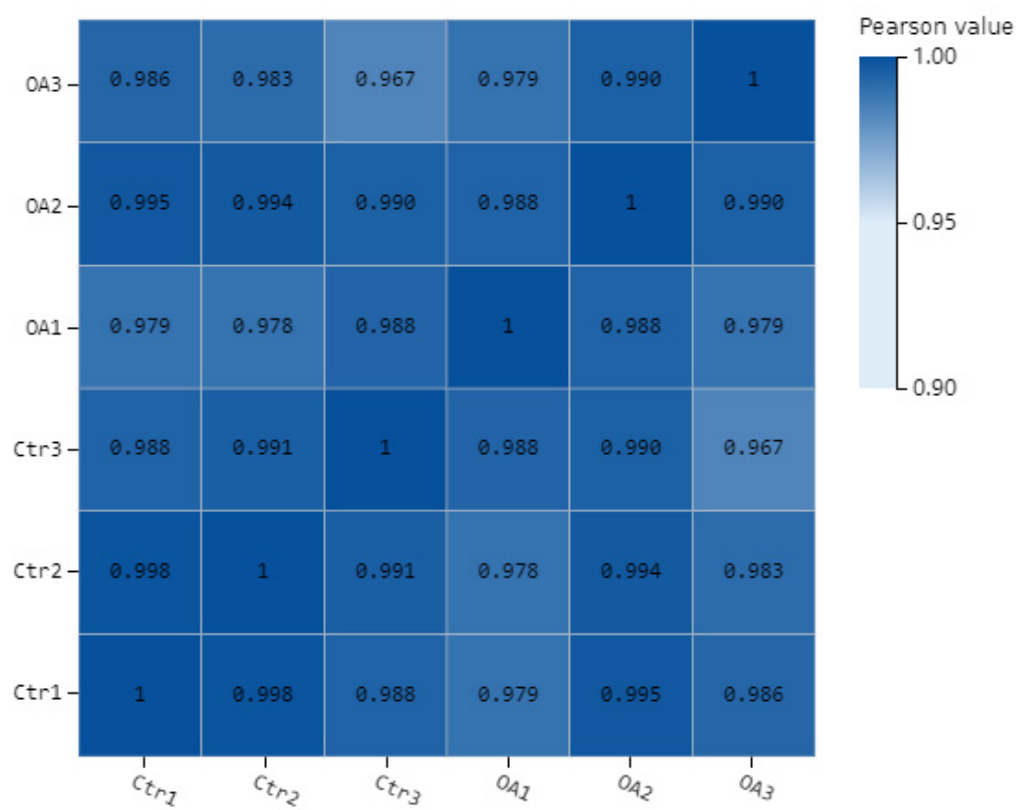

Supplement: s1 [file s1]
